# Supplementary material for: Evaluation of Multivariate Filters on Vibrational Spectroscopic Fingerprints for the PLS-DA and SIMCA Classification of Argan Oils from Four Moroccan Regions
Source: MDPI journal article supplement (doi:10.3390/molecules28155698), 2023-07-27
Supplement: s1 [file s1]

## Supplementary Materials

**Table S1.** The geographical origins, codes and number of samples used for the discrimination.

| Geographical origin | Code | Number of samples | Number of spectra in sub-sets |          |
|---------------------|------|-------------------|-------------------------------|----------|
|                     |      |                   | Training set                  | Test set |
| Agadir              | AG   | 27                | 54                            | 27       |
| Essaouira           | ES   | 31                | 62                            | 31       |
| Taroudant           | TA   | 24                | 48                            | 24       |
| Tiznit              | TZ   | 11                | 22                            | 11       |
| Total               |      | 93                | 186                           | 93       |

**Table S2.** Geographical parameters [46] and tocopherol contents [47] of the four provenances of Argan trees.

| Provenance | Altitude<br>(m) | Temperature<br>min-max (°C) | Rainfall<br>(mm/year) | Distance from<br>the coast (km) | $\alpha$ -tocopherol<br>(mg/kg) | $\beta$ -tocopherol<br>(mg/kg) | $\delta$ -tocopherol<br>(mg/kg) |
|------------|-----------------|-----------------------------|-----------------------|---------------------------------|---------------------------------|--------------------------------|---------------------------------|
| Taroudant  | 597             | 11.4–31.2                   | 210                   | 107                             | 57.19                           | 4.56                           | 80.2                            |
| Tiznit     | 497             | 12.7–26.3                   | 205                   | 63                              | 41.51                           | 3.02                           | 104.4                           |
| Essaouira  | 138             | 13.5–26.4                   | 292                   | 20                              | 25.01                           | 1.21                           | 58.6                            |
| Agadir     | 103             | 12.9–24.5                   | 264                   | 22                              | 34.98                           | 1.61                           | 71.0                            |

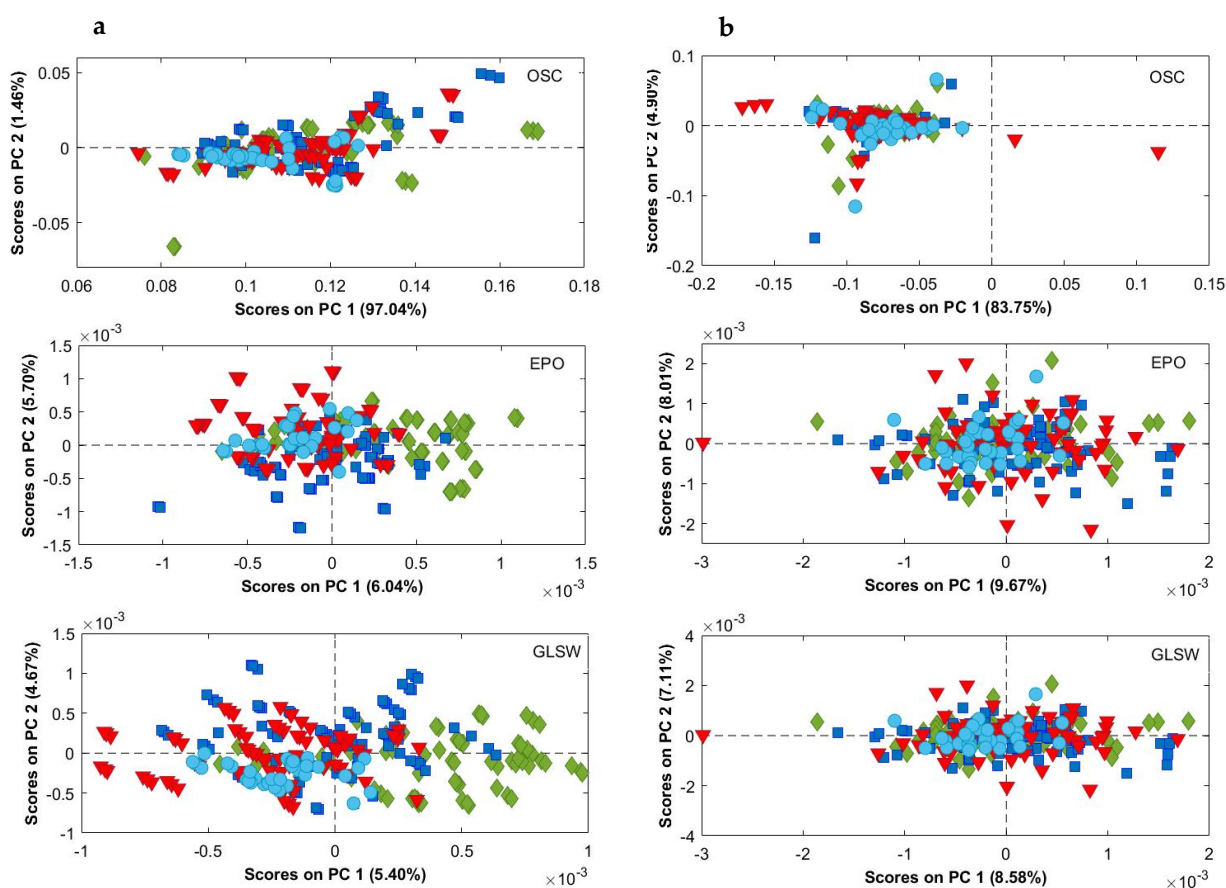

**Figure S1.** PCA score plots (PC1 vs PC2) of the MIR (a) and NIR (b) after random labelling and applying a filter method. Taroudant (▼); Essaouira (■); Agadir (◆); Tiznit (●).

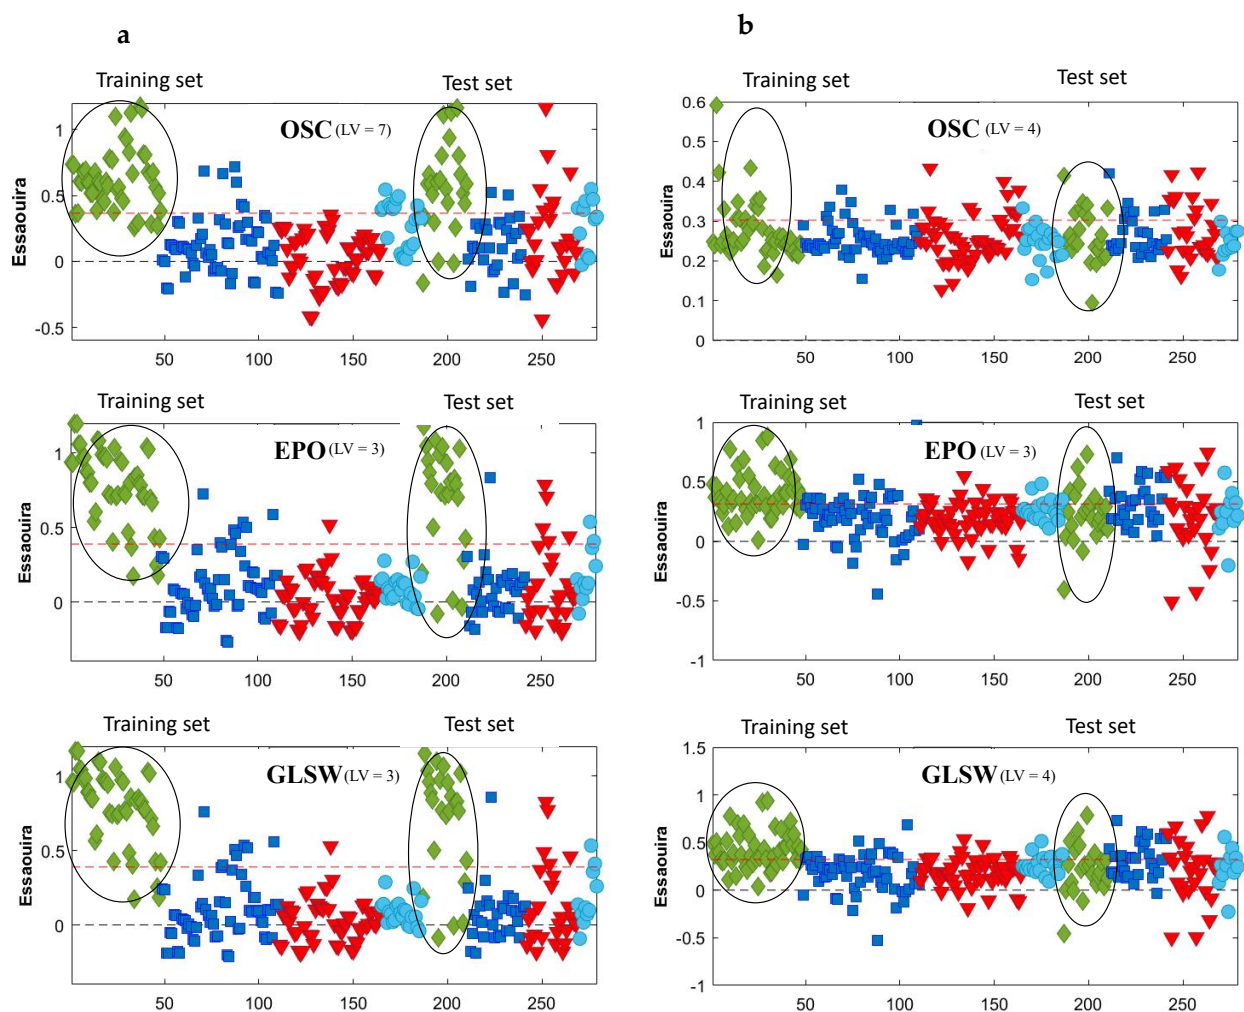

**Figure S2.** The prediction results for the Essaouira group from the randomly assigned classes data set applying a filter method and PLS-DA. (a) MIR and (b) NIR data. Agadir (■); Essaouira (◆); Taroudant (▼); Tiznit (●). The red dotted lines represent the classification threshold (or threshold value).
